# Supplementary material for: Decoherence imaging of spin ensembles using a scanning single-electron spin in diamond
Source: PubMed Central journal article supplement — Sci Rep. 2015 Jan 29;5:8119. doi: 10.1038/srep08119 (PMC4309953; doi:10.1038/srep08119), 2015-01-29
Supplement: srep08119-s1.pdf [file srep08119-s1.pdf]

# Decoherence imaging of spin ensembles using a scanning single-electron spin in diamond

*Lan Luan, Michael S. Grinolds, Sungkun Hong, Patrick Maletinsky, Ronald L. Walsworth and Amir Yacoby*

**Supplementary Discussion:** Extraction of the coherence time  $T_2$  under dynamical decoupling sequences.

We measure the NV spin coherence under dynamical decoupling sequences when the scanning nanopillar is in contact with the sample surface. To extract the coherence time  $T_2$ , we fit the measurements by stretched exponential envelopes multiplied by periodic Gaussian functions describing the collapses and revivals induced by nearby  $^{13}\text{C}$  nuclear spins. The fit function is  $C(t) = \text{Exp}(-(t/T_2(n))^p) \times (\sum_i \text{Exp}(-(t - i\tau_R(n))^2/\tau_{dev}(n)^2))$ , where  $C(t)$  is the coherence of the NV spin, exponent  $p$  is held the same for all curves,  $n$  is the number of  $\pi$  pulses in the sequences,  $\tau_R(n) = \tau_R^{echo} \times n/2$  is determined by the  $^{13}\text{C}$  nuclear Larmor frequency in the applied DC magnetic field, and  $\tau_{dev}(n)$  describes the revival peak width. We obtain  $p = 1.6 \pm 0.2$  and  $T_2$  for Echo, XY4, XY8 and 64- $\pi$ -pulse XY8 to be  $14.8 \pm 1.5 \mu\text{s}$ ,  $38.0 \pm 2.4 \mu\text{s}$ ,  $68 \pm 12 \mu\text{s}$ , and  $290 \pm 110 \mu\text{s}$  respectively. The data and the fits are plotted in the figure below.

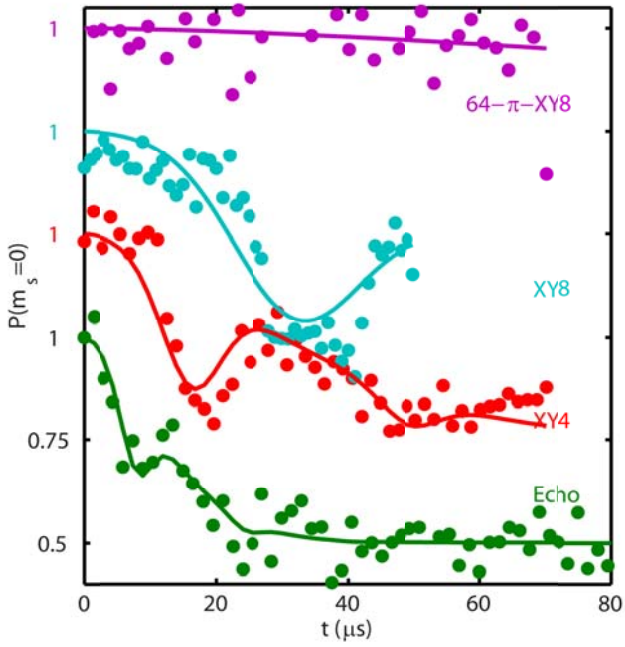

**Supplementary Figure:** Extraction of  $T_2$ . The data are identical to Fig 2b in the main text, and each sequences are shifted vertically by 0, 0.25, 0.5, and 0.75, respectively, for clarity. The solid lines plot the fits as described above, from which we extract  $T_2$ .
